# Supplementary material
Source: publisher figshare collection journal article supplement (https://acs.figshare.com/ndownloader/files/4773367)
Supplement: Supplementary file 1 [file 4773367]

  
data_nb060137

_publ_section_references
;
Bruker (2003). SAINT. Version 6.45. Bruker AXS Inc., Madison, Wisconsin,
USA.

Bruker (1999). SMART. Version 5.054. Bruker AXS Inc., Madison, Wisconsin,
USA.

Sheldrick, G.M. (2000). SHELXTL. Version 6.14. Bruker AXS Inc., Madison,
Wisconsin, USA.

Sheldrick, G.M. (1997). SHELXL97 & SHELXS97. University of Gottingen,
Germany.

Sheldrick, G.M. (1997b). SADABS. Version 2.10. Bruker AXS Inc., Madison,
Wisconsin, USA.
;
_publ_section_exptl_refinement
;
Hydrogen atoms were found in Fourier difference maps
and refined using a riding model.
;
_publ_requested_journal          J.Amer.Chem.Soc.
_publ_contact_author_name        'Andreas Decken'
_publ_contact_author_address     
;Department of Chemistry
University of New Brunswick
Fredericton, NB
E3B 6E2
Canada
;
_publ_contact_author_email       adecken@unb.ca
_publ_contact_author_phone       '(506) 453-4875'
_publ_contact_author_fax         '(506) 453-4981'
loop_
_publ_author_name
_publ_author_address
'Andreas Decken'
;Department of Chemistry
University of New Brunswick
Fredericton, NB
E3B 6E2
Canada
;
'Neil Burford'
;Department of Chemistry
Dalhousie University
Halifax, NS
B4H 4J3
Canada
;

_audit_creation_method           SHELXL-97
_chemical_name_systematic        ?
_chemical_name_common            ?
_chemical_melting_point          ?
_chemical_formula_moiety         ?
_chemical_formula_sum            'C25 H20 Cl F3 O3 P2 S'
_chemical_formula_weight         554.86

loop_
_atom_type_symbol
_atom_type_description
_atom_type_scat_dispersion_real
_atom_type_scat_dispersion_imag
_atom_type_scat_source
C C 0.0033 0.0016 'International Tables Vol C Tables 4.2.6.8 and 6.1.1.4'
H H 0.0000 0.0000 'International Tables Vol C Tables 4.2.6.8 and 6.1.1.4'
O O 0.0106 0.0060 'International Tables Vol C Tables 4.2.6.8 and 6.1.1.4'
F F 0.0171 0.0103 'International Tables Vol C Tables 4.2.6.8 and 6.1.1.4'
P P 0.1023 0.0942 'International Tables Vol C Tables 4.2.6.8 and 6.1.1.4'
S S 0.1246 0.1234 'International Tables Vol C Tables 4.2.6.8 and 6.1.1.4'
Cl Cl 0.1484 0.1585 'International Tables Vol C Tables 4.2.6.8 and 6.1.1.4'

_symmetry_cell_setting           monoclinic
_symmetry_space_group_name_H-M   'P n'
_symmetry_int_tables_number      7

loop_
_symmetry_equiv_pos_as_xyz
'x, y, z'
'x+1/2, -y, z+1/2'

_cell_length_a                   10.0707(16)
_cell_length_b                   8.8891(15)
_cell_length_c                   14.166(2)
_cell_angle_alpha                90.00
_cell_angle_beta                 104.192(3)
_cell_angle_gamma                90.00
_cell_volume                     1229.5(3)
_cell_formula_units_Z            2
_cell_measurement_temperature    173(1)
_cell_measurement_reflns_used    4133
_cell_measurement_theta_min      2.28
_cell_measurement_theta_max      28.06

_exptl_crystal_description       Plate
_exptl_crystal_colour            Colourless
_exptl_crystal_size_max          0.40
_exptl_crystal_size_mid          0.125
_exptl_crystal_size_min          0.025
_exptl_crystal_density_meas      ?
_exptl_crystal_density_diffrn    1.499
_exptl_crystal_density_method    'not measured'
_exptl_crystal_F_000             568
_exptl_absorpt_coefficient_mu    0.420
_exptl_absorpt_correction_type    multi-scan
_exptl_absorpt_correction_T_min  ?
_exptl_absorpt_correction_T_max  ?
_exptl_absorpt_process_details  'SADABS (Sheldrick, 1997b)'

_exptl_special_details           
; 
Crystal decay was monitored by repeating the initial 50 frames
at the end of the data collection and analyzing duplicate
reflections.
;

_diffrn_ambient_temperature      173(1)
_diffrn_radiation_probe          x-ray
_diffrn_radiation_type           MoK\a
_diffrn_radiation_wavelength     0.71073
_diffrn_source                   'fine-focus sealed tube'
_diffrn_source_type              'Bruker AXS SMART1000/P4'
_diffrn_radiation_monochromator  graphite
_diffrn_measurement_device_type  'CCD area detector'
_diffrn_measurement_method       'phi and omega scans'
_diffrn_detector_area_resol_mean ?
_diffrn_standards_number        0
_diffrn_standards_interval_count 0
_diffrn_standards_interval_time 0
_diffrn_standards_decay_%       0
_diffrn_reflns_number            8149
_diffrn_reflns_av_R_equivalents  0.0256
_diffrn_reflns_av_sigmaI/netI    0.0339
_diffrn_reflns_limit_h_min       -12
_diffrn_reflns_limit_h_max       13
_diffrn_reflns_limit_k_min       -11
_diffrn_reflns_limit_k_max       11
_diffrn_reflns_limit_l_min       -18
_diffrn_reflns_limit_l_max       17
_diffrn_reflns_theta_min         2.24
_diffrn_reflns_theta_max         27.49
_reflns_number_total             4027
_reflns_number_gt                3720
_reflns_threshold_expression     'I > 2\s(I)'

_computing_data_collection       'Bruker SMART'
_computing_cell_refinement       'Bruker SMART'
_computing_data_reduction        'Bruker SAINT'
_computing_structure_solution    'SHELXS-97 (Sheldrick, 1997)'
_computing_structure_refinement  'SHELXL-97 (Sheldrick, 1997)'
_computing_molecular_graphics    'Bruker SHELXTL'
_computing_publication_material  'Bruker SHELXTL'

_refine_special_details          
; 
 Refinement of F^2^ against ALL reflections.  The weighted R-factor wR and 
 goodness of fit S are based on F^2^, conventional R-factors R are based 
 on F, with F set to zero for negative F^2^. The threshold expression of 
 F^2^ > 2sigma(F^2^) is used only for calculating R-factors(gt) etc. and is 
 not relevant to the choice of reflections for refinement.  R-factors based 
 on F^2^ are statistically about twice as large as those based on F, and R- 
 factors based on ALL data will be even larger. 
;

_refine_ls_structure_factor_coef Fsqd
_refine_ls_matrix_type           full
_refine_ls_weighting_scheme      calc
_refine_ls_weighting_details     
'calc w=1/[\s^2^(Fo^2^)+(0.0349P)^2^+0.0883P] where P=(Fo^2^+2Fc^2^)/3'
_atom_sites_solution_primary     direct
_atom_sites_solution_secondary   difmap
_atom_sites_solution_hydrogens   difmap
_refine_ls_hydrogen_treatment    refall
_refine_ls_extinction_method     none
_refine_ls_extinction_coef       ?
_refine_ls_abs_structure_details 'Flack H D (1983), Acta Cryst. A39, 876-881'
_refine_ls_abs_structure_Flack   -0.04(5)
_refine_ls_number_reflns         4027
_refine_ls_number_parameters     396
_refine_ls_number_restraints     2
_refine_ls_R_factor_all          0.0311
_refine_ls_R_factor_gt           0.0256
_refine_ls_wR_factor_ref         0.0630
_refine_ls_wR_factor_gt          0.0602
_refine_ls_goodness_of_fit_ref   1.031
_refine_ls_restrained_S_all      1.030
_refine_ls_shift/su_max          0.000
_refine_ls_shift/su_mean         0.000

loop_
_atom_site_label
_atom_site_type_symbol
_atom_site_fract_x
_atom_site_fract_y
_atom_site_fract_z
_atom_site_U_iso_or_equiv
_atom_site_adp_type
_atom_site_occupancy
_atom_site_symmetry_multiplicity
_atom_site_calc_flag
_atom_site_refinement_flags
_atom_site_disorder_assembly
_atom_site_disorder_group
P1 P 0.06259(6) 0.06685(7) 0.50619(4) 0.01929(13) Uani 1 1 d . . .
P2 P 0.02229(6) -0.06494(7) 0.36668(4) 0.02269(14) Uani 1 1 d . . .
Cl Cl -0.18007(6) -0.10164(7) 0.36536(4) 0.03107(14) Uani 1 1 d . . .
C1 C -0.0428(2) 0.2319(3) 0.49205(15) 0.0219(5) Uani 1 1 d . . .
C2 C -0.0011(3) 0.3562(3) 0.44521(17) 0.0259(5) Uani 1 1 d . . .
C3 C -0.0861(3) 0.4791(3) 0.42308(18) 0.0307(6) Uani 1 1 d . . .
C4 C -0.2118(3) 0.4812(3) 0.4462(2) 0.0371(6) Uani 1 1 d . . .
C5 C -0.2526(3) 0.3595(4) 0.4925(2) 0.0389(7) Uani 1 1 d . . .
C6 C -0.1687(3) 0.2334(3) 0.51540(19) 0.0311(6) Uani 1 1 d . . .
C7 C 0.0327(2) -0.0578(3) 0.59872(16) 0.0211(5) Uani 1 1 d . . .
C8 C 0.0196(3) 0.0002(3) 0.68686(17) 0.0281(5) Uani 1 1 d . . .
C9 C 0.0115(3) -0.0971(3) 0.76214(18) 0.0308(6) Uani 1 1 d . . .
C10 C 0.0155(3) -0.2500(3) 0.74943(19) 0.0330(6) Uani 1 1 d . . .
C11 C 0.0279(3) -0.3090(3) 0.6610(2) 0.0333(6) Uani 1 1 d . . .
C12 C 0.0375(3) -0.2135(3) 0.58616(17) 0.0272(5) Uani 1 1 d . . .
C13 C 0.2398(2) 0.1220(3) 0.54065(16) 0.0225(5) Uani 1 1 d . . .
C14 C 0.2782(3) 0.2381(3) 0.60932(17) 0.0277(5) Uani 1 1 d . . .
C15 C 0.4159(3) 0.2691(3) 0.64543(19) 0.0329(6) Uani 1 1 d . . .
C16 C 0.5143(3) 0.1869(3) 0.61536(18) 0.0331(6) Uani 1 1 d . . .
C17 C 0.4766(3) 0.0737(3) 0.54693(18) 0.0324(6) Uani 1 1 d . . .
C18 C 0.3392(3) 0.0402(3) 0.50981(17) 0.0258(5) Uani 1 1 d . . .
C19 C 0.0147(2) 0.0916(3) 0.28312(15) 0.0227(5) Uani 1 1 d . . .
C20 C 0.1359(3) 0.1194(3) 0.25482(17) 0.0280(5) Uani 1 1 d . . .
C21 C 0.1395(3) 0.2330(3) 0.18854(19) 0.0333(6) Uani 1 1 d . . .
C22 C 0.0240(3) 0.3165(3) 0.15017(17) 0.0311(6) Uani 1 1 d . . .
C23 C -0.0957(3) 0.2904(3) 0.17786(17) 0.0306(6) Uani 1 1 d . . .
C24 C -0.1016(3) 0.1783(3) 0.24449(17) 0.0276(5) Uani 1 1 d . . .
C25 C 0.3191(3) 0.5679(3) 0.38447(19) 0.0350(6) Uani 1 1 d . . .
F1 F 0.2170(2) 0.5142(3) 0.31663(13) 0.0713(7) Uani 1 1 d . . .
F2 F 0.26562(17) 0.6277(2) 0.45303(11) 0.0430(4) Uani 1 1 d . . .
F3 F 0.3958(2) 0.4520(2) 0.42622(15) 0.0659(6) Uani 1 1 d . . .
S S 0.41925(6) 0.70405(7) 0.33495(4) 0.02823(14) Uani 1 1 d . . .
O1 O 0.5204(2) 0.7554(3) 0.41880(14) 0.0499(6) Uani 1 1 d . . .
O2 O 0.4729(3) 0.6203(2) 0.26658(14) 0.0503(6) Uani 1 1 d . . .
O3 O 0.3173(2) 0.8139(2) 0.29382(16) 0.0471(5) Uani 1 1 d . . .
H2 H 0.081(3) 0.350(3) 0.4287(18) 0.024(7) Uiso 1 1 d . . .
H3 H -0.061(3) 0.562(3) 0.393(2) 0.038(8) Uiso 1 1 d . . .
H4 H -0.276(3) 0.568(3) 0.427(2) 0.039(8) Uiso 1 1 d . . .
H5 H -0.330(3) 0.360(4) 0.507(2) 0.046(9) Uiso 1 1 d . . .
H6 H -0.195(3) 0.141(4) 0.551(2) 0.042(8) Uiso 1 1 d . . .
H8 H 0.025(3) 0.100(3) 0.6991(18) 0.023(7) Uiso 1 1 d . . .
H9 H 0.003(3) -0.057(3) 0.821(2) 0.044(8) Uiso 1 1 d . . .
H10 H 0.006(3) -0.321(3) 0.7983(18) 0.025(6) Uiso 1 1 d . . .
H11 H 0.025(4) -0.413(4) 0.650(2) 0.058(10) Uiso 1 1 d . . .
H12 H 0.046(3) -0.252(3) 0.523(2) 0.034(7) Uiso 1 1 d . . .
H14 H 0.208(3) 0.291(3) 0.6330(16) 0.018(6) Uiso 1 1 d . . .
H15 H 0.437(3) 0.330(4) 0.690(2) 0.038(8) Uiso 1 1 d . . .
H16 H 0.603(3) 0.205(3) 0.6470(19) 0.030(7) Uiso 1 1 d . . .
H17 H 0.545(3) 0.015(3) 0.5288(18) 0.024(7) Uiso 1 1 d . . .
H18 H 0.319(3) -0.043(3) 0.467(2) 0.038(8) Uiso 1 1 d . . .
H20 H 0.211(3) 0.062(3) 0.2794(18) 0.023(7) Uiso 1 1 d . . .
H21 H 0.220(3) 0.250(3) 0.1676(18) 0.027(7) Uiso 1 1 d . . .
H22 H 0.031(3) 0.402(3) 0.100(2) 0.043(8) Uiso 1 1 d . . .
H23 H -0.176(3) 0.348(3) 0.153(2) 0.038(8) Uiso 1 1 d . . .
H24 H -0.180(3) 0.159(3) 0.2659(17) 0.021(6) Uiso 1 1 d . . .

loop_
_atom_site_aniso_label
_atom_site_aniso_U_11
_atom_site_aniso_U_22
_atom_site_aniso_U_33
_atom_site_aniso_U_23
_atom_site_aniso_U_13
_atom_site_aniso_U_12
P1 0.0207(3) 0.0169(3) 0.0203(3) 0.0011(2) 0.0051(2) 0.0004(2)
P2 0.0255(3) 0.0203(3) 0.0217(3) -0.0005(2) 0.0046(2) 0.0011(3)
Cl 0.0269(3) 0.0311(3) 0.0328(3) 0.0015(3) 0.0026(2) -0.0060(3)
C1 0.0212(12) 0.0209(12) 0.0224(10) -0.0004(9) 0.0033(9) 0.0011(10)
C2 0.0314(14) 0.0202(13) 0.0267(11) 0.0000(10) 0.0081(10) -0.0021(10)
C3 0.0391(16) 0.0209(13) 0.0303(12) 0.0031(11) 0.0049(11) -0.0009(11)
C4 0.0374(16) 0.0292(14) 0.0421(14) 0.0026(12) 0.0046(12) 0.0108(13)
C5 0.0260(15) 0.0390(18) 0.0545(17) 0.0087(14) 0.0154(14) 0.0109(12)
C6 0.0294(14) 0.0271(14) 0.0386(13) 0.0057(11) 0.0114(11) 0.0044(11)
C7 0.0164(11) 0.0232(12) 0.0236(10) 0.0034(9) 0.0045(9) 0.0002(9)
C8 0.0316(14) 0.0251(14) 0.0286(12) 0.0004(11) 0.0094(10) 0.0009(11)
C9 0.0298(14) 0.0401(16) 0.0238(12) 0.0022(11) 0.0090(10) 0.0000(12)
C10 0.0301(14) 0.0359(16) 0.0326(12) 0.0129(12) 0.0068(11) -0.0055(12)
C11 0.0365(15) 0.0232(14) 0.0387(13) 0.0076(11) 0.0061(12) -0.0017(12)
C12 0.0314(14) 0.0254(13) 0.0250(11) 0.0015(10) 0.0072(10) 0.0000(11)
C13 0.0218(12) 0.0208(12) 0.0235(10) 0.0045(9) 0.0029(9) -0.0022(10)
C14 0.0303(14) 0.0246(13) 0.0272(11) 0.0000(10) 0.0052(10) -0.0007(11)
C15 0.0404(16) 0.0271(14) 0.0268(12) 0.0001(11) -0.0001(11) -0.0092(13)
C16 0.0255(14) 0.0417(16) 0.0296(12) 0.0106(12) 0.0019(11) -0.0074(12)
C17 0.0254(14) 0.0418(17) 0.0305(12) 0.0082(12) 0.0077(11) 0.0024(12)
C18 0.0288(13) 0.0247(13) 0.0236(11) 0.0029(10) 0.0059(10) 0.0005(11)
C19 0.0281(13) 0.0193(12) 0.0198(10) -0.0017(9) 0.0042(9) 0.0000(10)
C20 0.0291(14) 0.0277(14) 0.0262(11) 0.0017(10) 0.0050(10) 0.0029(11)
C21 0.0336(15) 0.0362(15) 0.0317(12) 0.0017(11) 0.0110(11) -0.0070(12)
C22 0.0377(15) 0.0290(14) 0.0239(11) 0.0022(11) 0.0026(10) -0.0052(12)
C23 0.0329(15) 0.0263(14) 0.0284(12) 0.0056(10) -0.0007(11) 0.0033(11)
C24 0.0254(13) 0.0312(14) 0.0248(10) 0.0018(10) 0.0035(10) 0.0005(11)
C25 0.0479(17) 0.0282(15) 0.0301(12) -0.0024(11) 0.0120(12) -0.0035(13)
F1 0.0887(16) 0.0749(15) 0.0478(11) -0.0155(10) 0.0116(10) -0.0526(13)
F2 0.0439(10) 0.0502(11) 0.0417(8) -0.0015(8) 0.0235(7) 0.0002(8)
F3 0.1016(17) 0.0377(11) 0.0733(12) 0.0259(10) 0.0503(12) 0.0264(11)
S 0.0319(3) 0.0245(3) 0.0300(3) 0.0007(3) 0.0108(2) 0.0047(3)
O1 0.0367(12) 0.0634(15) 0.0482(11) -0.0083(11) 0.0075(9) -0.0080(11)
O2 0.0823(16) 0.0355(12) 0.0443(11) 0.0002(9) 0.0372(11) 0.0103(11)
O3 0.0447(12) 0.0365(12) 0.0614(12) 0.0183(10) 0.0158(10) 0.0149(10)

_geom_special_details            
; 
 All esds (except the esd in the dihedral angle between two l.s. planes) 
 are estimated using the full covariance matrix.  The cell esds are taken 
 into account individually in the estimation of esds in distances, angles 
 and torsion angles; correlations between esds in cell parameters are only 
 used when they are defined by crystal symmetry.  An approximate (isotropic) 
 treatment of cell esds is used for estimating esds involving l.s. planes. 
;

loop_
_geom_bond_atom_site_label_1
_geom_bond_atom_site_label_2
_geom_bond_distance
_geom_bond_site_symmetry_2
_geom_bond_publ_flag
P1 C1 1.793(2) . ?
P1 C7 1.797(2) . ?
P1 C13 1.799(2) . ?
P1 P2 2.2471(8) . ?
P2 C19 1.816(2) . ?
P2 Cl 2.0595(9) . ?
C1 C6 1.387(4) . ?
C1 C2 1.405(3) . ?
C2 C3 1.376(4) . ?
C2 H2 0.92(3) . ?
C3 C4 1.383(4) . ?
C3 H3 0.92(3) . ?
C4 C5 1.379(4) . ?
C4 H4 1.00(3) . ?
C5 C6 1.393(4) . ?
C5 H5 0.85(3) . ?
C6 H6 1.03(3) . ?
C7 C8 1.387(3) . ?
C7 C12 1.398(3) . ?
C8 C9 1.391(4) . ?
C8 H8 0.91(3) . ?
C9 C10 1.374(4) . ?
C9 H9 0.93(3) . ?
C10 C11 1.391(4) . ?
C10 H10 0.96(3) . ?
C11 C12 1.380(3) . ?
C11 H11 0.94(3) . ?
C12 H12 0.98(3) . ?
C13 C18 1.391(3) . ?
C13 C14 1.406(3) . ?
C14 C15 1.384(4) . ?
C14 H14 0.98(3) . ?
C15 C16 1.379(4) . ?
C15 H15 0.82(3) . ?
C16 C17 1.384(4) . ?
C16 H16 0.91(3) . ?
C17 C18 1.387(4) . ?
C17 H17 0.95(3) . ?
C18 H18 0.95(3) . ?
C19 C24 1.396(4) . ?
C19 C20 1.397(3) . ?
C20 C21 1.386(4) . ?
C20 H20 0.91(3) . ?
C21 C22 1.374(4) . ?
C21 H21 0.94(3) . ?
C22 C23 1.376(4) . ?
C22 H22 1.05(3) . ?
C23 C24 1.384(4) . ?
C23 H23 0.96(3) . ?
C24 H24 0.93(3) . ?
C25 F1 1.313(3) . ?
C25 F2 1.332(3) . ?
C25 F3 1.335(3) . ?
C25 S 1.822(3) . ?
S O2 1.429(2) . ?
S O3 1.433(2) . ?
S O1 1.437(2) . ?

loop_
_geom_angle_atom_site_label_1
_geom_angle_atom_site_label_2
_geom_angle_atom_site_label_3
_geom_angle
_geom_angle_site_symmetry_1
_geom_angle_site_symmetry_3
_geom_angle_publ_flag
C1 P1 C7 112.68(11) . . ?
C1 P1 C13 109.13(11) . . ?
C7 P1 C13 107.60(10) . . ?
C1 P1 P2 110.73(7) . . ?
C7 P1 P2 107.09(8) . . ?
C13 P1 P2 109.52(8) . . ?
C19 P2 Cl 103.41(8) . . ?
C19 P2 P1 98.24(8) . . ?
Cl P2 P1 93.18(3) . . ?
C6 C1 C2 120.1(2) . . ?
C6 C1 P1 122.15(19) . . ?
C2 C1 P1 117.36(19) . . ?
C3 C2 C1 119.4(3) . . ?
C3 C2 H2 122.6(17) . . ?
C1 C2 H2 117.9(17) . . ?
C2 C3 C4 120.7(3) . . ?
C2 C3 H3 121.0(19) . . ?
C4 C3 H3 118.3(19) . . ?
C5 C4 C3 119.9(3) . . ?
C5 C4 H4 119.0(17) . . ?
C3 C4 H4 121.0(17) . . ?
C4 C5 C6 120.5(3) . . ?
C4 C5 H5 120(2) . . ?
C6 C5 H5 119(2) . . ?
C1 C6 C5 119.4(3) . . ?
C1 C6 H6 118.1(18) . . ?
C5 C6 H6 122.6(18) . . ?
C8 C7 C12 119.8(2) . . ?
C8 C7 P1 119.85(19) . . ?
C12 C7 P1 120.03(18) . . ?
C7 C8 C9 119.7(2) . . ?
C7 C8 H8 121.5(16) . . ?
C9 C8 H8 118.5(16) . . ?
C10 C9 C8 120.4(2) . . ?
C10 C9 H9 120.7(19) . . ?
C8 C9 H9 118.9(19) . . ?
C9 C10 C11 120.2(2) . . ?
C9 C10 H10 123.2(15) . . ?
C11 C10 H10 116.6(15) . . ?
C12 C11 C10 119.9(3) . . ?
C12 C11 H11 119(2) . . ?
C10 C11 H11 121(2) . . ?
C11 C12 C7 120.0(2) . . ?
C11 C12 H12 121.6(17) . . ?
C7 C12 H12 118.3(17) . . ?
C18 C13 C14 120.3(2) . . ?
C18 C13 P1 120.96(19) . . ?
C14 C13 P1 118.29(19) . . ?
C15 C14 C13 118.8(2) . . ?
C15 C14 H14 121.7(14) . . ?
C13 C14 H14 119.3(15) . . ?
C16 C15 C14 120.8(2) . . ?
C16 C15 H15 121(2) . . ?
C14 C15 H15 118(2) . . ?
C15 C16 C17 120.5(3) . . ?
C15 C16 H16 116.4(17) . . ?
C17 C16 H16 122.9(17) . . ?
C16 C17 C18 119.9(3) . . ?
C16 C17 H17 119.7(16) . . ?
C18 C17 H17 120.3(16) . . ?
C17 C18 C13 119.8(2) . . ?
C17 C18 H18 116.6(18) . . ?
C13 C18 H18 123.5(18) . . ?
C24 C19 C20 119.9(2) . . ?
C24 C19 P2 125.13(19) . . ?
C20 C19 P2 114.96(18) . . ?
C21 C20 C19 119.5(3) . . ?
C21 C20 H20 120.7(17) . . ?
C19 C20 H20 119.8(17) . . ?
C22 C21 C20 120.1(3) . . ?
C22 C21 H21 119.8(16) . . ?
C20 C21 H21 120.0(16) . . ?
C21 C22 C23 120.8(2) . . ?
C21 C22 H22 117.9(17) . . ?
C23 C22 H22 121.3(17) . . ?
C22 C23 C24 120.2(2) . . ?
C22 C23 H23 121.8(18) . . ?
C24 C23 H23 118.0(18) . . ?
C23 C24 C19 119.5(2) . . ?
C23 C24 H24 122.3(16) . . ?
C19 C24 H24 118.2(16) . . ?
F1 C25 F2 107.1(3) . . ?
F1 C25 F3 108.0(2) . . ?
F2 C25 F3 106.2(2) . . ?
F1 C25 S 111.56(18) . . ?
F2 C25 S 112.11(18) . . ?
F3 C25 S 111.6(2) . . ?
O2 S O3 115.58(13) . . ?
O2 S O1 114.61(14) . . ?
O3 S O1 114.33(14) . . ?
O2 S C25 104.60(13) . . ?
O3 S C25 101.56(14) . . ?
O1 S C25 103.87(13) . . ?

_diffrn_measured_fraction_theta_max 0.973
_diffrn_reflns_theta_full        27.49
_diffrn_measured_fraction_theta_full 0.973
_refine_diff_density_max         0.309
_refine_diff_density_min         -0.176
_refine_diff_density_rms         0.046
